# Supplementary material
Source: publisher figshare collection journal article supplement (https://karger.figshare.com/ndownloader/files/26704622)
Supplement: Supplementary file 1 [file 26704622]

Table S2. Effect of sex and NBS sampling age on measured concentrations of T4, TSH and TBG, and the calculated T4/TBG ratio.

|  | df | F-statistic | p-valuea | Partial η² |
| --- | --- | --- | --- | --- |
| T4 |  |  |  |  |
| Sex | 1 | 8.107 | 0.004 | 0.005 |
| NBS sampling age | 3 | 9.101 | 0.000b | 0.016 |
| Sex*NBS sampling age | 3 | 0.227 | 0.878c | 0.000 |
| TSH (Log10) |  |  |  |  |
| Sex | 1 | 0.39 | 0.844 | 0.000 |
| NBS sampling age | 3 | 11.854 | 0.000d | 0.021 |
| Sex*NBS sampling age | 3 | 1.467 | 0.222c | 0.003 |
| TBG |  |  |  |  |
| Sex | 1 | 7.350 | 0.007 | 0.004 |
| NBS sampling age | 3 | 1.529 | 0.205 | 0.003 |
| Sex*NBS sampling age | 3 | 0.336 | 0.799c | 0.001 |
| T4/TBG ratio |  |  |  |  |
| Sex | 1 | 0.762 | 0.383 | 0.000 |
| NBS sampling age | 3 | 13.592 | 0.000e | 0.024 |
| Sex*NBS sampling age | 3 | 0.299 | 0.826c | 0.001 |

NBS = newborn screening, T4 = thyroxine (nmol/L blood), TBG = thyroxine binding globuline (nmol/L), TSH = thyroid stimulating hormone (mIU/L blood).
aTwo-way ANOVA
bPost-hoc analysis (Tukey HSD) shows a significant difference of T4 concentrations between day 4 and days 6 (p = 0.006) and 7 (p = 0.000), and between day 5 and days 6 (p = 0.005) and 7 (p = 0.000); Identified homogeneous subsets: 1. days 4 and 5 (p = 0.722); 2. days 6 and 7 (p = 0.995).
cA P-value >0.05 states that no interaction effects between both variables was found.
dPost-hoc analysis (Tukey HSD) shows a significant difference of TSH (Log10) concentrations between day 4 and days 5, 6 and 7 (p = 0.000); Identified homogeneous subsets: 1. days 4; 2. days 5, 6 and 7 (p = 0.500).
ePost-hoc analysis (Tukey HSD) shows a significant difference of the T4/TBG ratio between day 4 and days 6 (p = 0.000) and 7 (p = 0.000), and between day 5 and days 6 (p = 0.030) and 7 (p = 0.000).
Identified homogeneous subsets: 1. days 4 and 5 (p = 0.334); 2. days 6 and 7 (p = 0.179).
